# Supplementary material for: High Fat Diets Induce Colonic Epithelial Cell Stress and Inflammation that is Reversed by IL-22
Source: PubMed Central journal article supplement (PMC4924095; doi:10.1038/srep28990), 2016-06-28
Supplement: srep28990-s1.pdf [file srep28990-s1.pdf]

## Supplementary Information

### High Fat Diets Induce Colonic Epithelial Cell Stress and Inflammation that is Reversed by IL-22

Max Gulhane<sup>1</sup>, Lydia Murray<sup>1</sup>, Rohan Lourie<sup>1</sup>, Hui Tong<sup>1</sup>, Yong H. Sheng<sup>1</sup>, Ran Wang<sup>1</sup>, Alicia Kang<sup>2</sup>, Veronika Schreiber<sup>1</sup>, Kuan Yau Wong<sup>1</sup>, Graham Magor<sup>3</sup>, Stuart Denman<sup>4</sup>, Jakob Begun<sup>1</sup>, Timothy H. Florin<sup>1</sup>, Andrew Perkins<sup>3</sup>, Páraic Ó Cuív<sup>2</sup>, Michael McGuckin<sup>1</sup> and Sumaira Z. Hasnain<sup>1</sup>

*(1) Immunity, Infection and Inflammation Program, (2) University of Queensland Diamantina Institute, Translational Research Institute (3) Blood and Bone Diseases Program, Mater Research Institute - The University of Queensland, Translational Research Institute, Brisbane, Australia, (4) The Commonwealth Scientific and Industrial Research Organization, St Lucia, Brisbane, Australia*

The authors declare no conflict of interest

#### Correspondence

Dr. Sumaira Z. Hasnain

Mater Research Institute – University of Queensland, Translational Research Institute, 37 Kent St, Woolloongabba, Qld 4102

t: +61-7-34436939, f: +61-7-31632550 ; E: [sumaira.hasnain@mater.uq.edu.au](mailto:sumaira.hasnain@mater.uq.edu.au)

#### ABBREVIATIONS

IBD, inflammatory bowel disease; KLF4: Kruppel-like factor 4 ER, endoplasmic reticulum; UPR, unfolded protein response; sXBP1, spliced X-box binding protein 1; PERK, protein kinase RNA-like ER kinase; ATF6, activating transcription factor 6; IRE-1, inositol requiring enzyme-1; NEFA, Non-esterified fatty acid; ROS, reactive oxygen species; iNOS, inducible nitric oxide synthase.

### **Supplementary Figure Legends:**

Supplementary Figure 1: Wild-type C57BL/6 mice were fed a high fat diet (HFD) or regular control diet (Con) for 3 weeks (n=6-7 per group), 11 weeks (n=5-6 per group) or 22 weeks (n=8-12 per group). **(a)** Final body weights (in grams) of mice at the time of sampling. **(b)** TNF- $\alpha$ , IL-1 $\beta$ , and IL-17a secreted by anti-CD3/anti-CD45-stimulated leukocytes isolated from mesenteric lymph nodes of control and mice kept on a HFD for 22 weeks. The red dashed line depicts the limit of detection. mRNA level of proinflammatory cytokines **(c)** *Il4*, **(d)** *Il13* and **(e)** *Il23* was determined by qRT-PCR in the distal colon. Normalized to *B-actin* and expressed as a fold change of the respective controls. n = 6-8. Data presented as mean  $\pm$  SEM, One way ANOVA with Bonferroni post-test. \*p<0.05 \*\*p<0.01 \*\*\*p<0.001.

Supplementary Figure 2: Wild-type C57BL/6 mice were fed a high fat diet (HFD) or regular control diet (Con) for 3 weeks (n=6-7 per group), 11 weeks (n=5-6 per group) or 22 weeks (n=8-12 per group). **(a, c, e)** Volumetric analysis of mature mucin as a percentage of crypt area as depicted by Periodic Acid Schiff's-Alcian blue staining shown in Fig 2a. **(b, d, f)** ImageJ analysis of area stained with Muc2 antibody using immunohistochemistry. qRT-PCR was used to determine the levels of **(g)** goblet cell protein trefoil factor 3 (*Tff3*) and **(h)** goblet cell differentiation factor *Spdef*. Data is normalized to *B-actin* and expressed as a fold change of the respective controls. **(i)** Immunohistochemistry and area stained analysis with Muc2 precursor antibody was used to assess the Muc2 misfolding. **(j)** Immunofluorescence was used to determine the levels of claudin-1 (original images depicted in Fig. 2e) **(k)** Crypt length measurements ( $\mu$ M). Data presented as mean  $\pm$  SEM or box plots with whiskers show median. Q1, Q3 and min/max, One-Way ANOVA with Bonferroni post-test. \*p<0.05 \*\*p<0.01 \*\*\*p<0.001.

Supplementary Figure 3: Colon weight/length ratio from wild-type C57BL/6 or *Winnie* mice fed a high fat diet (HFD) or normal chow diet (NCD) for 9 weeks following weaning (3 weeks of age). One-Way ANOVA with Bonferroni post-test. \*\*\*p<0.001 compared to NCD. n = 5-8.

Supplementary Figure 4: **(a)** Serum triglyceride levels in control mice compared to mice kept on HFD for 3, 1 and 22 weeks. n = 6-8. LS174T cells were treated with Control BSA, 0.5mM Palmitate or 1 mM butyrate, 1 mM propionate, 15 mM acetate or 50 ng/mL of IL-22 for 24 hours. mRNA levels of ER stress markers **(b)** *GRP78*, **(c)** *spliced XBP1*, goblet cell differentiation factor **(d)** *KLF4*, major component of goblet cells **(e)** *MUCIN-2* and the component of the glycocalyx cell surface **(f)** *MUCIN-1*, was determined by qRT-PCR. qRT-PCR was used to determine the expression of oxidative stress marker *Nos2* **(g)**, and Griess Assay was used to determine the changes in oxidative stress protein Nitrite **(h)**. qRT-PCR data is normalized to mean expression of *β-Actin* and expressed as a fold change compared to BSA controls. Statistics: n= 8 per group (2 individual experiments). One way ANOVA with Bonferroni post-test; \*p<0.05 \*\*p<0.01 \*\*\*p<0.001.

Supplementary Figure 5: Wild-type C57BL/6 mice were fed a high fat diet (HFD) or normal chow diet (Con) for 22 weeks. After 18 weeks, recombinant IL-22 was administered at 20 ng/g or 100 ng/g i.p for 4 weeks. **(a)** Colon weight/length ratio was determined as a measure of inflammation. **(b)** Staining with mature Muc2 antibody, imageJ analysis depicting the intracellular Muc2 staining as a percentage of crypt area. **(c)** Crypt length measurements (μM). **(d)** Staining with Ki67 antibody to assess a change in proliferation. **(e)** Representative images of epithelial cell apoptosis detected by triphosphate nick-end labeling (TUNEL) staining in the colon. Negative control shows background autofluorescence and positive control shows apoptosis in epithelial cells digested with DNase. **(f)** Staining with Grp78 antibody, showing an increase in ER stress in HFD mice and a reduction with IL-22 treatment. One-Way ANOVA with Bonferroni post-test. \*\*\*p<0.001 compared to NCD. n = 8-12.

Supplementary Figure 6: Levels of *Bifidobacterium* spp., *Clostridium* cluster XIVa, *Bacteroides* spp. and *Clostridium* cluster IV were determined in the DNA extracted from faecal samples. n = 4 per group. One way ANOVA with Bonferroni post-test; \*p<0.05 \*\*p<0.01 \*\*\*p<0.001.

# Supplementary Figure 1

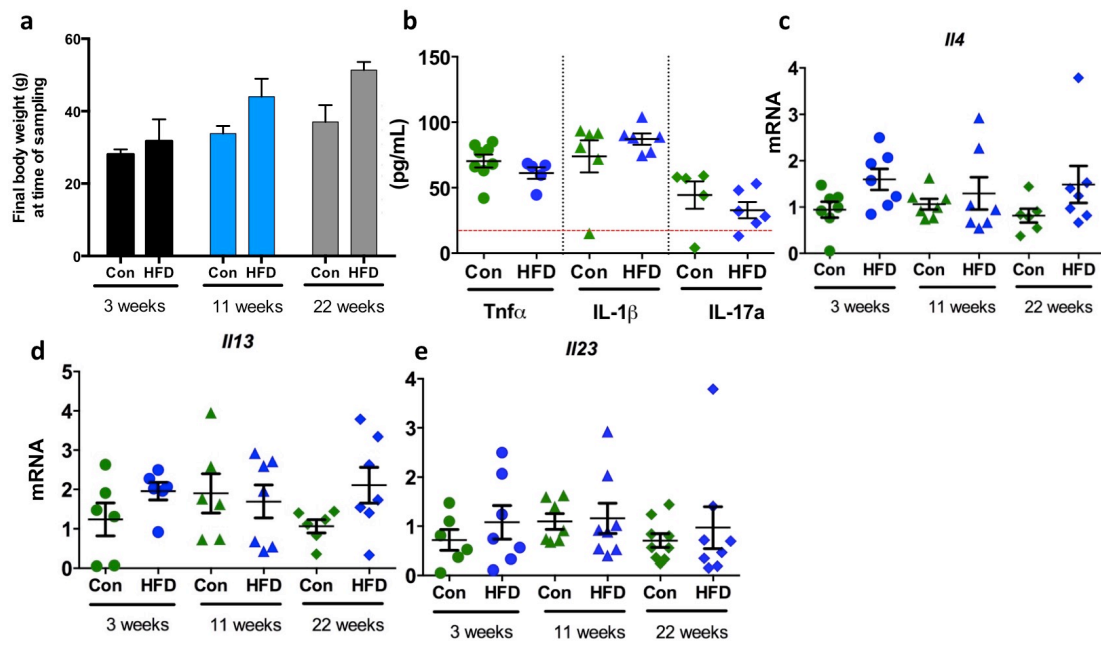

## Supplementary Figure 2

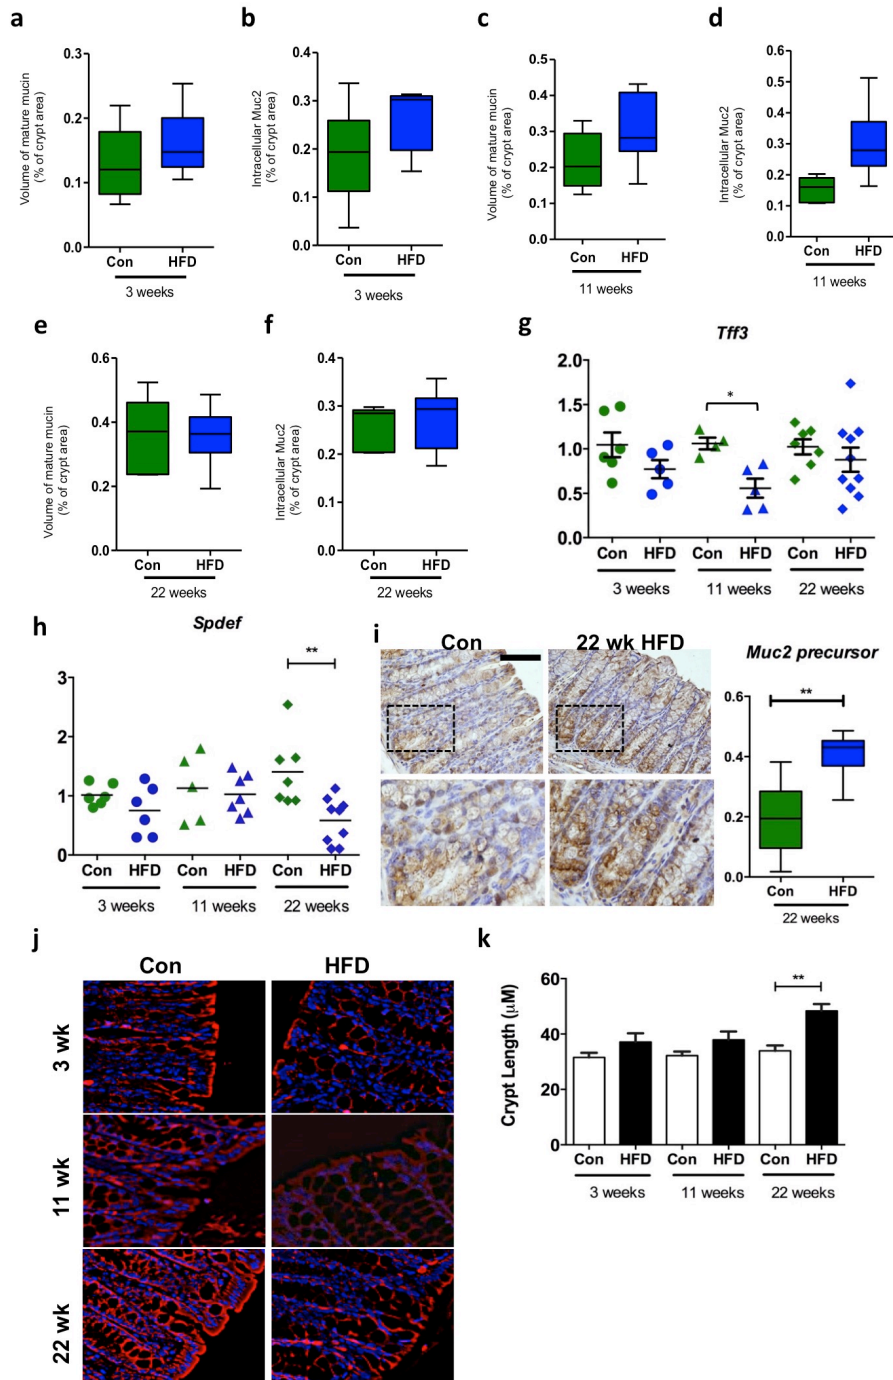

Supplementary Figure 3

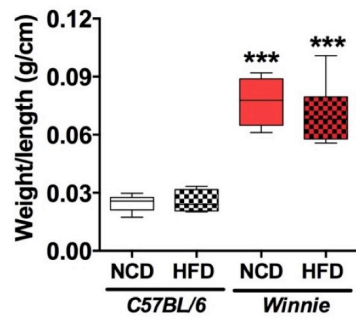

Supplementary Figure 4

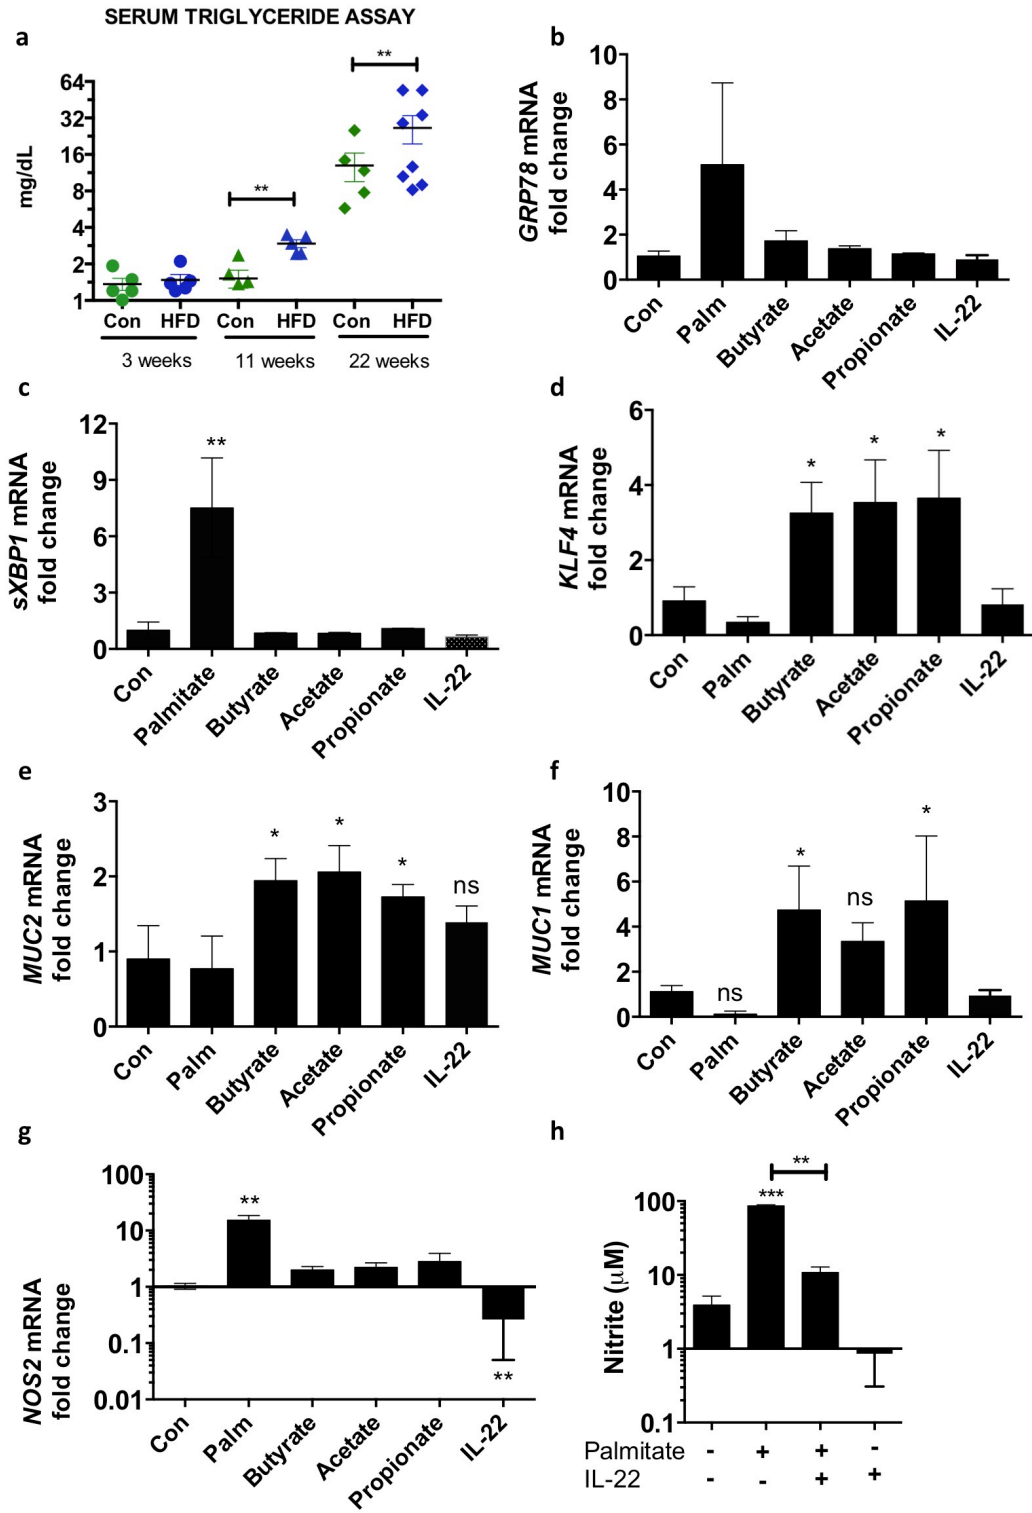

# Supplementary Figure 5

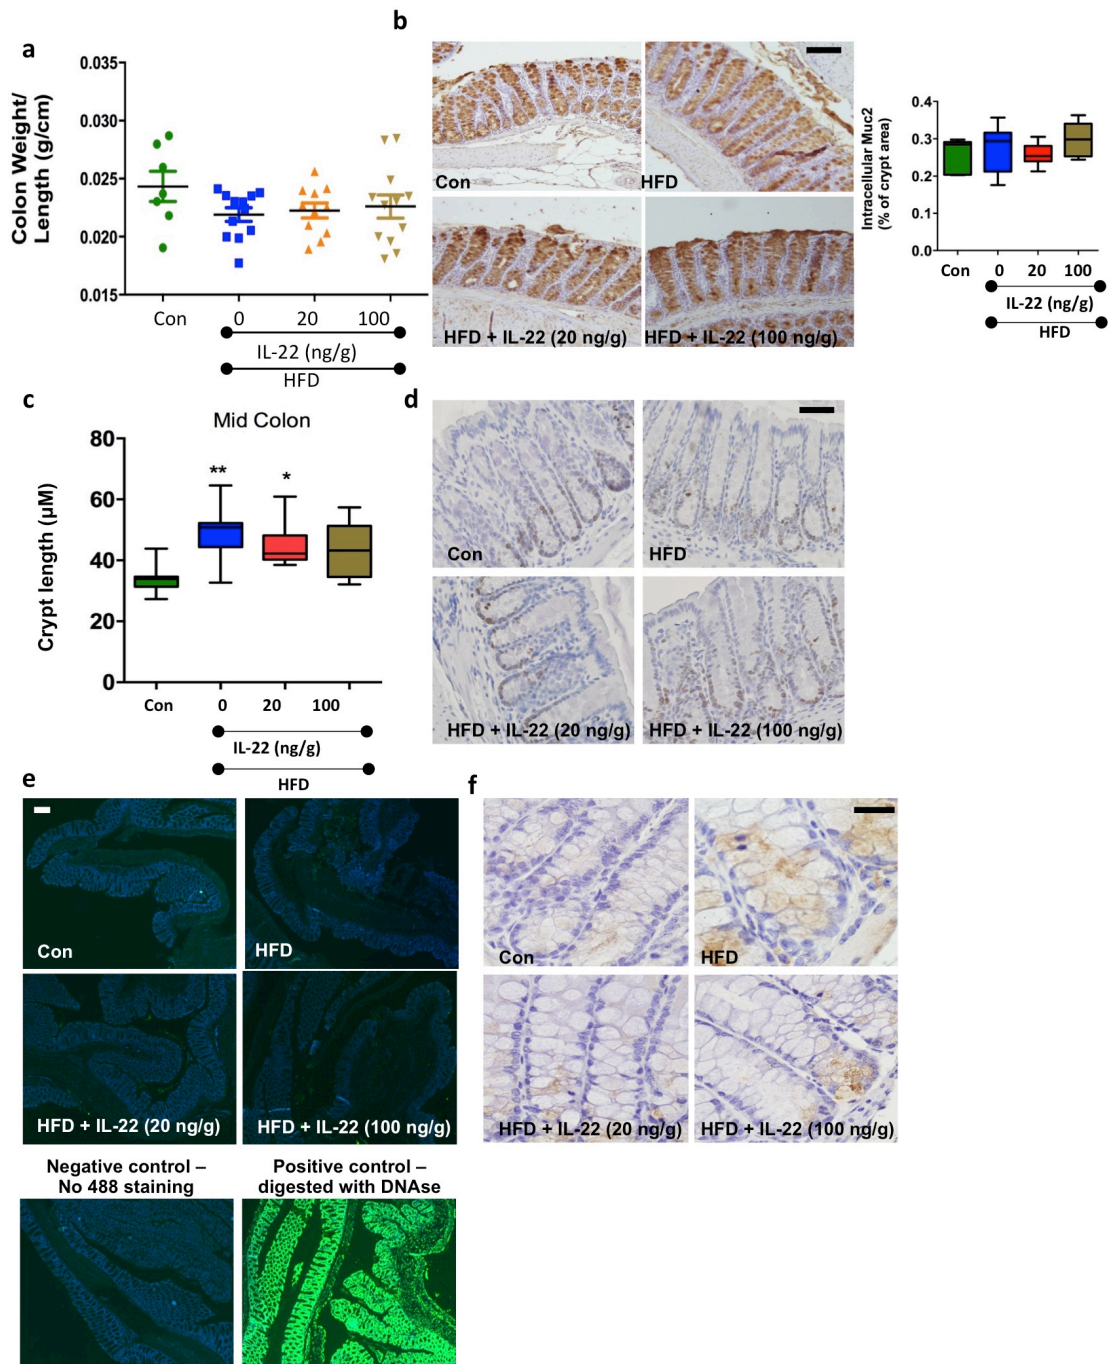



## Supplementary Figure 6

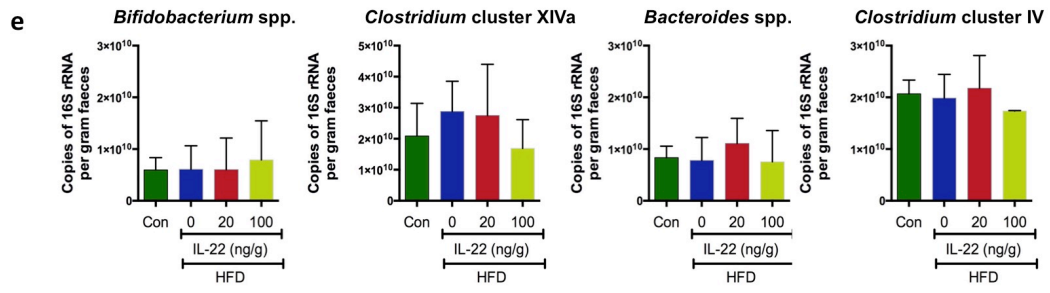

Supplementary Table 1 – Mouse Primer sequences

| Target gene                  | Forward Primer (5'–3')    | Reverse Primer (5'–3')       |
|------------------------------|---------------------------|------------------------------|
| <i><b><i>β-actin</i></b></i> | AGCACTGTGTTGGCATAGAGGTC   | CTTCTTGGGTATGGAATCCTGTG      |
| <i><b><i>Edem1</i></b></i>   | AAGCCTGCAATGAAGGAGAA      | CTATCAGCACCTGCAGTCCA         |
| <i><b><i>Grp78</i></b></i>   | TGCTGCTAGGCCTGCTCCGA      | CGACCACCGTGCCACATCC          |
| <i><b><i>Il18</i></b></i>    | CAACCAACAAGTGATATTCTCCATG | GATCCACACTCTCCAGCTGCA        |
| <i><b><i>Il17a</i></b></i>   | CTCCAGAAGGCCCTCAGACTAC    | AGCTTTCCCTCCGCATTGACACAG     |
| <i><b><i>Il4</i></b></i>     | GAGCTCGTATGTAGGGCTTC      | GCCCGAAAGAGTCTCTGC           |
| <i><b><i>Il22</i></b></i>    | CCGAGGAGTCAGTGCTAAGG      | CATGTAGGGCTGGAACCTGT         |
| <i><b><i>Il23</i></b></i>    | TGTCACGGAGGAATCACAAG      | TGTGCATGTGAAGAGTTTGGA        |
| <i><b><i>Klf4</i></b></i>    | AGCCACCCACACTTGTGACTATG   | CAGTGGTAAGGTTTCTCGCCTGTG     |
| <i><b><i>Muc2</i></b></i>    | CCATTGAGTTTGGGAACATGC     | TTCGGCTCGGTGTTCAAG           |
| <i><b><i>Muc1</i></b></i>    | CCCCCTGGCACATACTGGG       | ACCTCACACACGGAGCGCCAG        |
| <i><b><i>Muc4</i></b></i>    | GCTCAAGTTGACAAGGAGCAGAGC  | GGAGGACAAAAGAAGGCGTGGCC      |
| <i><b><i>Muc13</i></b></i>   | GCCAGTCTCCACCACGGTA       | CTGGGACCTGTGCTTCCACCG        |
| <i><b><i>Nos2</i></b></i>    | CAGCTGGGCTGTACAAACCTT     | CATTGGAAGTGAAGCGTTTCG        |
| <i><b><i>Spdef</i></b></i>   | GGTGCCTGCTACTGTTCCAGATG   | AAAGCCACTTCTGCACGTTACCAG     |
| <i><b><i>sXbp1</i></b></i>   | GAGTCCGCAGCAGGTGC         | CAAAAGGATATCAGACTCAGAATCTGAA |
| <i><b><i>Tff3</i></b></i>    | CCTGGTTGCTGGGTCCTCTGG     | GTCTCCTGCAGAGGTTTGAAGC       |
| <i><b><i>Tnfa</i></b></i>    | CATCTTCTCAAATTCGAGTGACAA  | TGGGAGTAGACAAGGTACAACCC      |

Supplementary Table 2 – Human Primer sequences

| Target gene    | Forward Primer (5'–3') | Reverse Primer (5'–3')       |
|----------------|------------------------|------------------------------|
| <i>B-ACTIN</i> | CCTGTACGCCAACACAGTGC   | ATACTCCTGCTTGCTGATCC         |
| <i>GRP78</i>   | GCCTGTATTCTAGACCTGCC   | TTCATCTTGCCAGCCAGTTG         |
| <i>KLF4</i>    | AGAGGAGCCCAAGCCAAAGA   | CAGTCACAGTGGTAAGGTTTCTC      |
| <i>MUC1</i>    | CCCCTATGAGAAGGTTTCTGC  | ACCTGAGTGGAGTGAATGG          |
| <i>MUC2</i>    | CAGCACCGATTGCTGAGTTG   | GCTGGTCATCTCAATGGCAG         |
| <i>NOS2</i>    | CACTCAGCTGTGCATCGAC    | CAGTTCCCGAAACCACTCGT         |
| <i>sXBP1</i>   | GAGTCCGCAGCAGGTGC      | CAAAAGGATATCAGACTCAGAATCTGAA |

Supplementary Table 3 – Bacterial Primer sequences

| Target gene                     | Forward Primer (5'–3')    | Reverse Primer (5'–3')    |
|---------------------------------|---------------------------|---------------------------|
| Universal 16S rRNA              | CGGCAACGAGCGCAACCC        | CCATTGTAGCACGTGTGTAGCC    |
| <i>Akkermansia muciniphila</i>  | CAGCACGTGAAGGTGGGGAC      | CCTTGCGGTTGGCTTCAGAT      |
| <i>Clostridium</i> cluster IV   | TTACTGGGTGTAAAGGG         | TAGAGTGCTCTTGCGTA         |
| <i>Clostridium</i> cluster XIVa | AAATGACGGTACCTGACTAA      | CTTTGAGTTTCATTCTTGCGAA    |
| <i>Prevotella</i> spp.          | CACRGTAACGATGGATGCC       | GGTCGGGTTGCAGACC          |
| <i>Bacteroides</i> spp.         | AAGGTCCCCACATTGG          | GAGCCGCAAACCTTCACAA       |
| <i>Bifidobacterium</i> spp.     | GGGTGGTAATGCCGGATG        | CCACCGTTACACCGGGAA        |
| <i>E. coli</i>                  | GGAAGAAGCTTGCTTCTTTGCTGAC | AGCCCGGGGATTTACATCTGACTTA |
